# Supplementary material for: Effects of ionic structures on shear thickening fluids composed of ionic liquids and silica nanoparticles
Source: Royal Society of Chemistry journal article supplement (doi:10.1039/c6ra12460g), 2016-01-01
Supplement: c6ra12460g1.pdf [file c6ra12460g1.pdf]

## Supporting information

### Effects of the ionic structures on shear thickening fluids composed of ionic liquids and silica nanoparticles

Jianbin Qin, Guangcheng Zhang\*, Zhonglei Ma, Jiantong Li,  
Lisheng Zhou, Xuetao Shi\*

Department of Applied Chemistry, School of Science, Northwestern  
Polytechnical University, Xi'an 710072, P. R. China.

Corresponding author: Guangcheng Zhang    Email: zhangguc@nwpu.edu.cn

Corresponding author: Xuetao Shi            Email: shixuetao@nwpu.edu.cn

Telephone: +86-29-88431680.            Fax: +86-29-88431680.

The osmotic mixing of the polymer solvation layers on surface of approaching particles with the dispersing medium as well as the elastic compression of them can be described by two repulsive potential functions.<sup>1</sup> For our case, the mixing term is ignored for the polymers solvation layers are same as the dispersing medium. The repulsive potential function of the elastic compression as follows,

$$V_{elastic} = \left( \frac{2\pi a k_B T \delta^2 \varphi \rho}{M} \right) \left[ \frac{h}{\delta} \ln \left[ \frac{h}{\delta} \left( \frac{3 - \frac{h}{\delta}}{2} \right)^2 \right] - 6 \ln \left( \frac{3 - \frac{h}{\delta}}{2} \right) + 3 \left( 1 - \frac{h}{\delta} \right) \right] \quad (S1)$$

where,  $a$  is the particle radius;  $k_B$  is the Boltzmann constant;  $T$  is the temperature of the system;  $\delta$  is the solvation layer thickness;  $h$  is the distance between two particles;  $\varphi$  is the volume fraction of the dispersing medium contained in the solvation layers (equal to 1 for our case);  $\rho$  is the medium density;  $M$  is the molecular weight of a oligomer chain of the dispersing medium.

When  $0 < h < 2\delta$ , the steric hindrance force expression is got by differentiating the potential functions with respect to the distance between particles for a constant temperature system.

$$F_{elastic} = - \frac{dV_{elastic}}{dh} = \left( \frac{2\pi a k_B T \delta^2 \rho}{M} \right) [2 \ln(2) - \ln \left( \frac{h}{\delta} \left( 3 - \frac{h}{\delta} \right)^2 \right)] \quad (S2)$$

$$F_{steric} = F_{elastic} \sim \delta^2 \left[ 2 \ln(2) - \ln \left( \frac{h}{\delta} \left( 3 - \frac{h}{\delta} \right)^2 \right) \right] \quad (\text{S3})$$

**Table S1 Conductivity of the dispersing medium**

| Sample       | PEG-400                   | [EMIm]BF <sub>4</sub> | [BMIm]BF <sub>4</sub> | [EOHMIIm]BF <sub>4</sub> |
|--------------|---------------------------|-----------------------|-----------------------|--------------------------|
| Conductivity | $3.91 \times 10^{-4}$ S/m | 1.83 S/m              | 0.35 S/m              | 0.68 S/m                 |

**Table S2 Dynamic knife stabbing testing sample parameters**

| Label                                                | Dimension: Length<br>(cm) by width (cm) | STF weight<br>percentage (%) | Single layer areal<br>density (g/m <sup>2</sup> ) | Number of layers<br>in target |
|------------------------------------------------------|-----------------------------------------|------------------------------|---------------------------------------------------|-------------------------------|
| Kevlar                                               | 15 × 15                                 | 0.00                         | 240.00                                            | 10                            |
| (PEG-400/SiO <sub>2</sub> )-Kevlar                   | 15 × 15                                 | 48.08                        | 462.25                                            | 8                             |
| ([EMIm]BF <sub>4</sub> /SiO <sub>2</sub> )-Kevlar    | 15 × 15                                 | 42.17                        | 415.01                                            | 8                             |
| ([BMIm]BF <sub>4</sub> /SiO <sub>2</sub> )-Kevlar    | 15 × 15                                 | 45.83                        | 443.05                                            | 8                             |
| ([EOHMIIm]BF <sub>4</sub> /SiO <sub>2</sub> )-Kevlar | 15 × 15                                 | 40.29                        | 401.94                                            | 8                             |

**Table S3** Tensile strength testing sample parameters

| Label                                                | Number of layers<br>in sample | Layer areal<br>density (g/m <sup>2</sup> ) | STF weight<br>percentage (%) | Dimension: Length<br>(cm) by width (cm) |
|------------------------------------------------------|-------------------------------|--------------------------------------------|------------------------------|-----------------------------------------|
| Kevlar                                               | 1                             | 240.00                                     | 0.00                         | 15 × 4                                  |
| (PEG-400/SiO <sub>2</sub> )-Kevlar                   | 1                             | 462.25                                     | 48.08                        | 15 × 4                                  |
| ([EMIm]BF <sub>4</sub> /SiO <sub>2</sub> )-Kevlar    | 1                             | 415.01                                     | 42.17                        | 15 × 4                                  |
| ([BMIm]BF <sub>4</sub> /SiO <sub>2</sub> )-Kevlar    | 1                             | 443.05                                     | 45.83                        | 15 × 4                                  |
| ([EOHMIIm]BF <sub>4</sub> /SiO <sub>2</sub> )-Kevlar | 1                             | 401.94                                     | 40.29                        | 15 × 4                                  |

**Table S4** Conductivity of neat Kevlar fabrics and STF-treated Kevlar fabric composites

| Sample | Neat Kevlar<br>fabrics | (PEG-<br>400/SiO <sub>2</sub> )/Kevlar<br>fabrics | ([EMIm]BF <sub>4</sub> /SiO <sub>2</sub> )<br>/Kevlar fabrics | ([BMIm]BF <sub>4</sub> /SiO <sub>2</sub> )/<br>Kevlar fabrics | ([EOHMIIm]BF <sub>4</sub> /SiO <sub>2</sub> )<br>/Kevlar fabrics |
|--------|------------------------|---------------------------------------------------|---------------------------------------------------------------|---------------------------------------------------------------|------------------------------------------------------------------|
|--------|------------------------|---------------------------------------------------|---------------------------------------------------------------|---------------------------------------------------------------|------------------------------------------------------------------|

|              |                                     |                                     |                                    |                                    |                                    |
|--------------|-------------------------------------|-------------------------------------|------------------------------------|------------------------------------|------------------------------------|
| Conductivity | $0.568 \times 10^{-10} \text{ S/m}$ | $0.312 \times 10^{-10} \text{ S/m}$ | $0.327 \times 10^{-4} \text{ S/m}$ | $0.178 \times 10^{-4} \text{ S/m}$ | $0.216 \times 10^{-4} \text{ S/m}$ |
|--------------|-------------------------------------|-------------------------------------|------------------------------------|------------------------------------|------------------------------------|

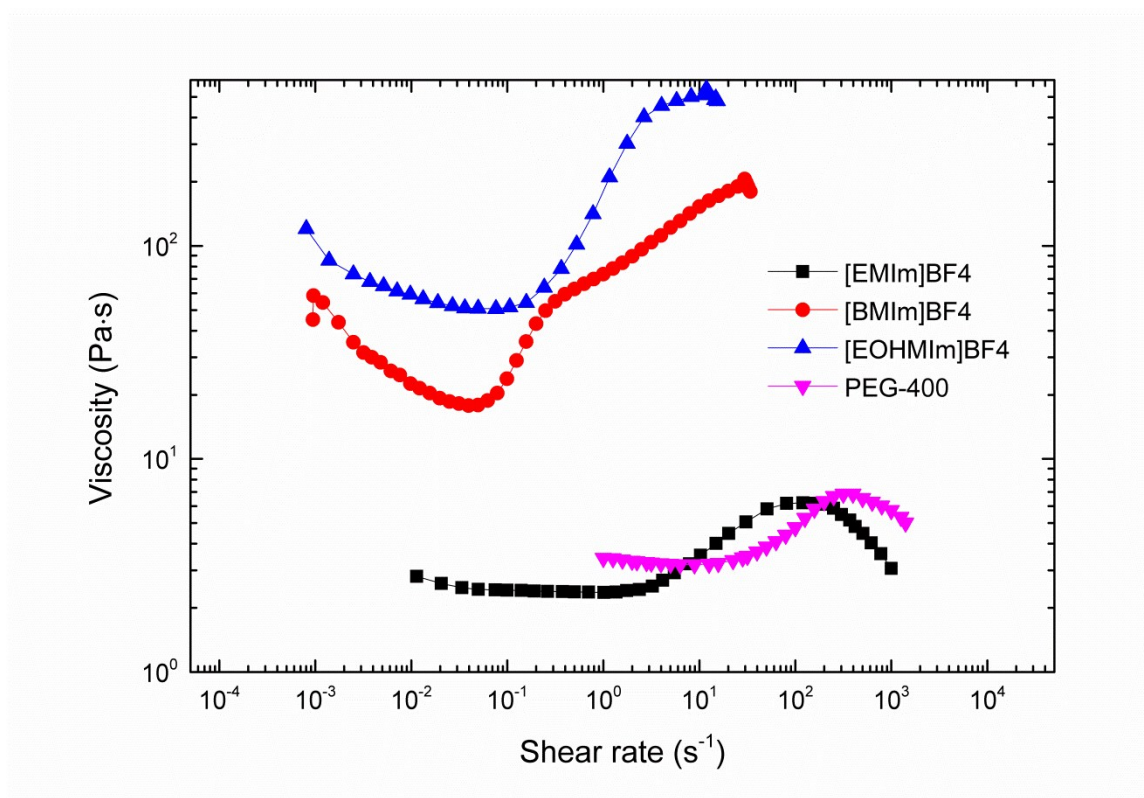

**Figure S1** Shear rate dependencies of viscosity for the dispersions with 15 vol % silica nanoparticles in PEG-400, [EMIm]BF<sub>4</sub>, [BMIm]BF<sub>4</sub> and [EOHmIm]BF<sub>4</sub>, respectively

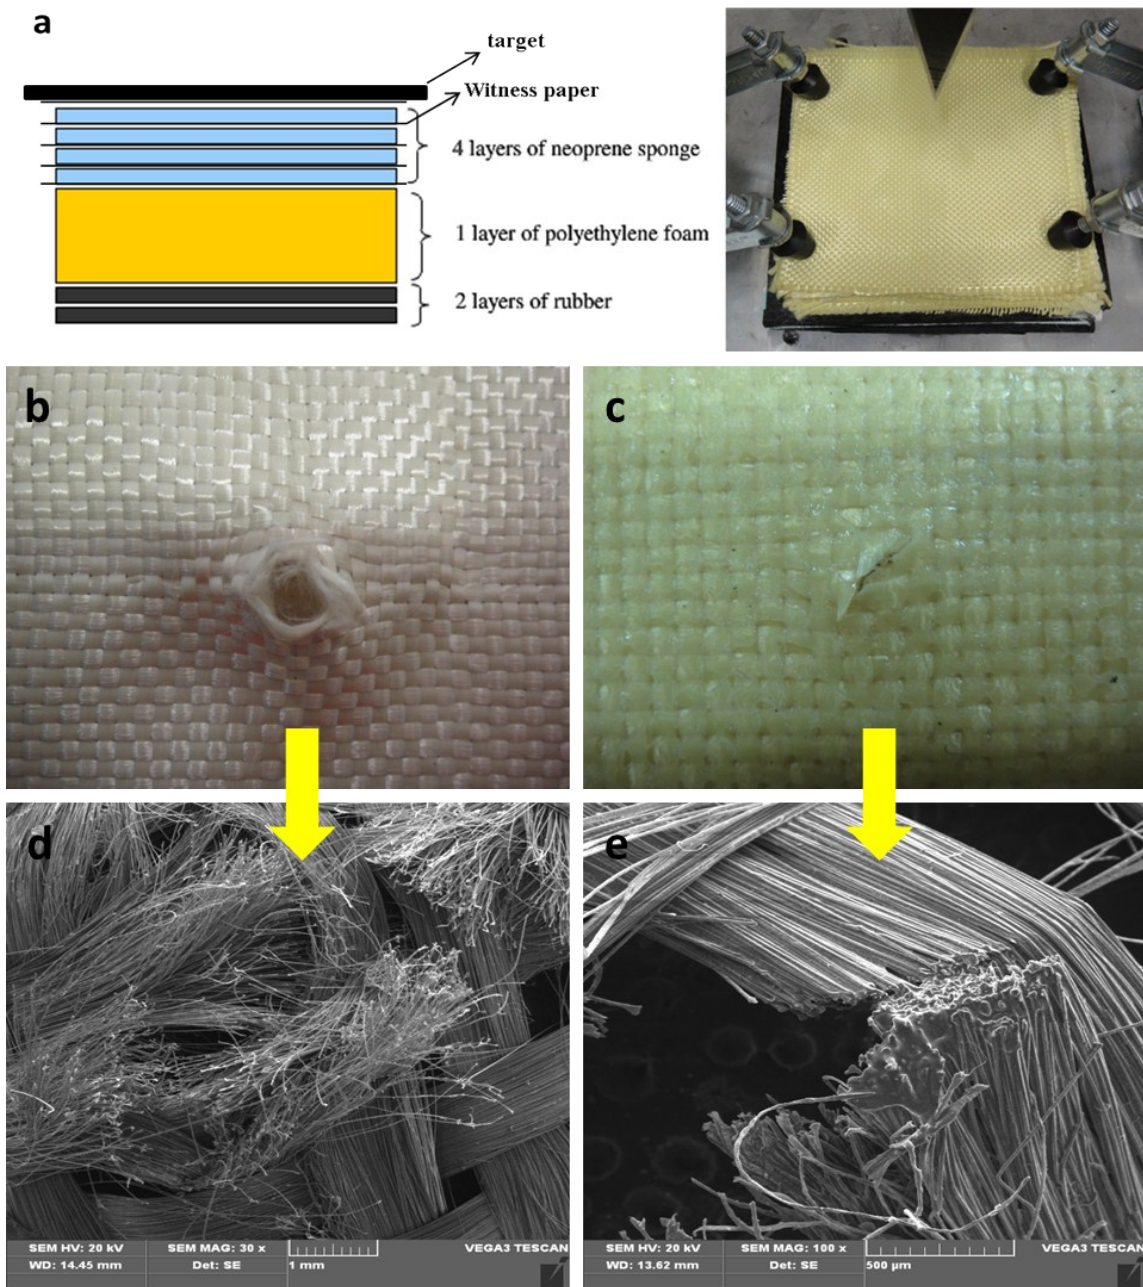

**Figure S2** (a) schematic illustrations of the testing sample installation and the photograph of it. The dynamic knife stabbing tests results for the same impact energy: (b) the photograph of the breaking sample for neat Kevlar fabric; (c) the photograph of the breaking sample for STF-treated Kevlar fabric; (d) SEM image of the breaking sample for neat Kevlar fabric in (b); (e) SEM image of the breaking sample for STF-



treated Kevlar fabric in (c)

## REFERENCES

- (1) Vincent, B.; Edwards, J.; Emmett, S.; Jones, A. Depletion Flocculation in Dispersions of Sterically-Stabilised Particles (“soft Spheres”). *Colloids Surf.* **1986**, 18, 261–281.
